# Supplementary figures and images for: Arbuscular Mycorrhizal Fungal Communities in the Soils of Desert Habitats
Source: MDPI journal article supplement (doi:10.3390/microorganisms9020229), 2021-01-22

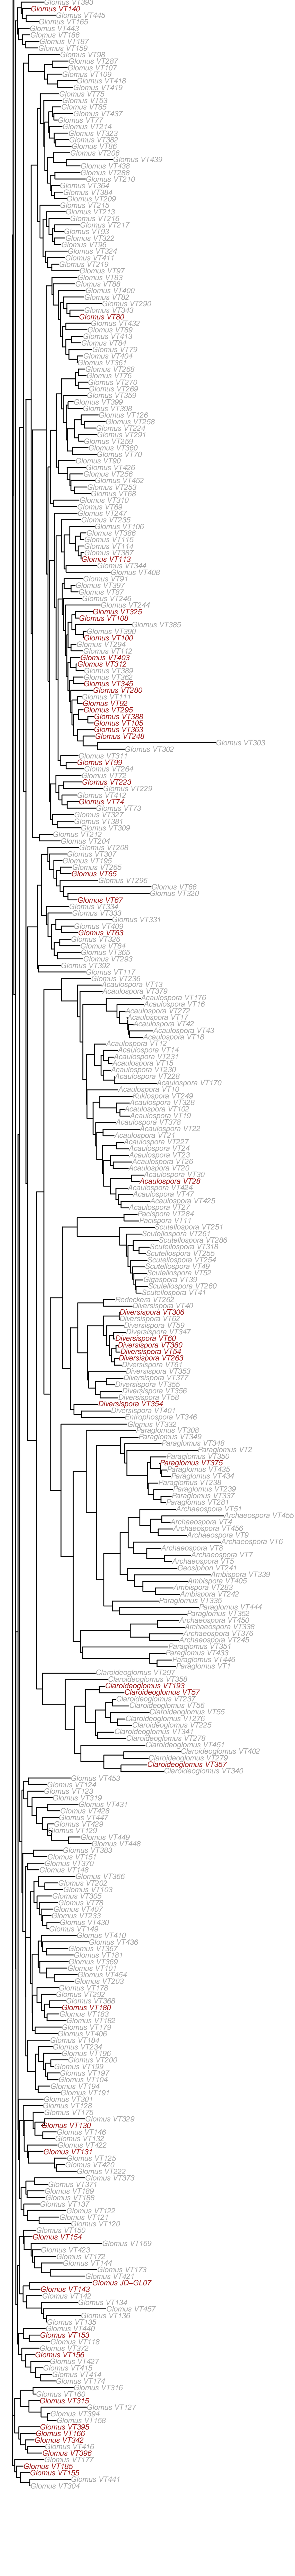

Supplement: s1 [file s1]
